# Supplementary material for: Genome-wide identification and characterization of long non-coding RNAs involved in the early somatic embryogenesis in Dimocarpus longan Lour
Source: BMC Genomics. 2018 Nov 6;19:805. doi: 10.1186/s12864-018-5158-z (PMC6219066; doi:10.1186/s12864-018-5158-z)
Supplement: Supplementary file 9 — Table S6. Primers used for real-time quantitative PCR. (XLS 64 kb) [file 12864_2018_5158_MOESM9_ESM.xls]

## Sheet: Table S6
Table S6 Primers used for real-time quantitative PCR
Primer name	Primer sequences ( 5' to 3' )
LTCONS-00037848-Forward	TTAGTTTGCATGCAGGTAGGC
LTCONS-00037848-Reverse	ATTGGAAGGTTCTGGTGGG
LTCONS-00029834-Forward	GAGCTCATCACTCAATCACATC
LTCONS-00029834-Reverse	GCAAACCCAGAGAAACCA
LTCONS-00022673-Forward	GGCAATCAAGAGTAGCGACC
LTCONS-00022673-Rverse	TGTCCTGTTGTCACGAGTCG
LTCONS-00050060-Forward	CAGTCCAATCTCTCTCCCA
LTCONS-00050060-Reverse	GCAAGAAACCAAGGAAATCC
LTCONS-00053938-Forward	AAAGGAAGCAGTGGGTGTT
LTCONS-00053938-Reverse	ACGGGACTTGTAGACAGCA
LTCONS-00022307-Forward	GTTCAACAACCCATTAGCG
LTCONS-00022307-Reverse	GACAGAAGAAGCAAGACGAAG
LTCONS-00057369-Forward	GACACCCAGTACATGTTGCC
LTCONS-00057369-Reverse	CCCAGAAGTCAACAGTGCAAT
LTCONS-00031272-Forward	GTTGTTCTTTATCCTCTGCACTC
LTCONS-00031272-Reverse	TTCCTTCCCTGAGCCTTT
LTCONS-00045469-Forward	CGACCACTACCACAAACAGG
LTCONS-00045469-Reverse	CGTGGACGATGTTGAGATG
LTCONS-00030919-Forward	TGGAGACTGGAGAGAGAGAGGA
LTCONS-00030919-Reverse	AACCAACCAAAGGCATCAGT
LTCONS-00031251-Forward	TGTACACGTTGCCATACCCT
LTCONS-00031251-Reverse	ACTGTCCAATCTTTGCACCC
LTCONS-00027338-Forward	TGGATTATGAGAGGCACTACG
LTCONS-00027338-Reverse	GTATCCGCCGAAATAACG
LTCONS-00045113-Forward	CTGCCTGTCTTTTCGCCATT
LTCONS-00045113-Reverse	GGAGAGTCGATGAGGTGGAT
LTCONS-00038577-Forward	TACAACTCTGGGATCGCGAA
LTCONS-00038577-Reverse	GCCCCTAAGATTACACCCGA
LTCONS-00013909-Forward	ATGTCCTGTACCTCCCCTT
LTCONS-00013909-Reverse	AACCGGTCGACATCTAGTGA
LTCONS-00021462-Forward	GCTAGGCAGGTATATTCATTCAATC
LTCONS-00021462-Reverse	TGTTAATTTGGAGCAGCTTTTGG
LTCONS-00010999-Forward	CGTGAAGAAGAGAAGAATGGAC
LTCONS-00010999-Reverse	CCAGGAAGCAGGAGATAACA
LTCONS-00038201-Forward	AGCACTGTCTCACTCTTCTTCA
LTCONS-00038201-Reverse	CGGTCAACACTCAATAGCAA
LTCONS-00031543-Forward	CAATCGTCCGTGAGCTGTT
LTCONS-00031543-Reverse	GGCTGCCCAATAACTCCTT
Dlo-008446.1-Forward	TTCAACCGCACGAAACAAGT
Dlo-008446.1-Reverse	CCACAAAGATACAAGCAAGGG
MTCONS-00005366-Forward	GCACGAGAACATCCCCTTTC
MTCONS-00005366-Reverse	CCCAGCTGCTCTCACAAAAG
Dlo-025410.1-Forward	AAGGAAGCAGATTGGGTCGA
Dlo-025410.1-Reverse	ACGCATCTCAACTCCTCCTC
Dlo-029572.1-Forward	TCCTCCGTGAAGTCAACCT
Dlo-029572.1-Reverse	CAGAAGACGCACAACACAG
dlo-035444.1-Forward	ATAGGTGTCGGAGCTGCTA
dlo-035444.1-Reverse	AAAGCAAAGCCCAAAATGG
MTCONS-00027329-Forward	TCCAATCCTTACTCAGCCAG
MTCONS-00027329-Reverse	GGGACTACTATGGGCTTCTG
MTCONS-00045470-Forward	ATGCAAGTGGTGTGGTGTTC
MTCONS-00045470-Reverse	GCTTTTCTGCTTCGCTTGGA
MTCONS-00011043-Forward	CACCGGCTTGTTACACCAAA
MTCONS-00011043-Reverse	GGACCAACCCTGCAGCTATA
Dlo-016560.1-Forward	TACCTCTGACCTTGCATGCA
Dlo-016560.1-Reverse	CGAAAACTCACGACAGCACT
MTCONS-00031549-Forward	GACATAGAGGTTGATGGTGGTT
MTCONS-00031549-Reverse	GCTCCAAACACTGAACTTCC
dlo-miR157d	CGGTGACAGAAGATAGAGAGCAC
Dlo-015319.1-Forward	CAGTGGCTGTGTTCATTGCT
Dlo-015319.1-Reverse	TTGGGGAGTGAAGTGAGAGG
LTCONS-00025525-Forward	TCTCTCTCTCTCTCCCACACA
LTCONS-00025525-Reverse	TAAACAAGAGTACCCACAAAGCT
Dlo-003834.1-Forward	GCAGGAAGAGAAGGAGGAGG
Dlo-003834.1-Reverse	TGGCAGAGTCAACAGAACCT
LTCONS-00006334-Forward	CACTACATTTCGCGGCAACT
LTCONS-00006334-Reverse	TGGTTGATCAGTCTGTGCCT
1.dlo-miR476a	GGAGAAGCTCTTCTTTGCAAAG
2.dlo-miR810b	GGAAAGTGATTTTAATTATGACGG
LTCONS-00008111-Forward	AGGGTAAGCTTTCGTCATGC
LTCONS-00008111-Reverse	TTCAGTCGAGTCAGGGCTTT
MTCONS-00008108-Forward	AAGCCTAAACCTACCACACTTT
MTCONS-00008108-Reverse	GACCAGACTAGCACCACCTC
3.dlo-miR162a*	GGAGGCAGCGGTTCATCA
4.dlo-miR482a	TCTTTCCAACACCTCCCATACC
5.dlo-miR172a	GGAGAATCTTGATGATGCTGCA
6.dlo-miR417	GGAGAAGTAGTGGAATTTGTGTCG
3.MTCONS-00030224&LTCONS-00030223-Forward	GCGACAGAAACAAGAAGAAATGC
3.MTCONS-00030224&LTCONS-00030223-Reverse	TTAGCGACCACATCTTTGCC
4.5MTCONS-00030224&LTCONS-00030223-Forward	ACACAAAATACTACAGGCCGAC
4.5MTCONS-00030224&LTCONS-00030223-Reverse	TGCTGGAATGCTTGAATGGC
6.MTCONS-00030224&LTCONS-00030223-Forward	CCCTCTCTCATCCTTTGCCA
6.MTCONS-00030224&LTCONS-00030223-Reverse	TGACAACACTGATGCTGCTG
1.LTCONS-00030223-Forward	TGCTTGTGTACAACTGGTGC
1.LTCONS-00030223-Reverse	GAGAAACTCCAATAGCACAGGT
2.LTCONS-00030223-Forward	TGCTAGCCATTAACCTTCTGC
2.LTCONS-00030223-Reverse	TCTCTTGTCATGTCAGATCGC
7.dlo-miR160a	TGCCTGGCTCCCTGTATG
8.dlo-miR774b	GGTAGAGATGGAGATTTGGATG
9.dlo-miR806a	ATGTTGCTAACAAAGTCAAACGG
7.LTCONS-00055024-Forward	ATGAGGCCCCTGTTTCTTCA
7.LTCONS-00055024-Reverse	GGTTGGATTCGTCTCTGGGA
8.LTCONS-00055024-Forward	TCCCTTTCCCGATGCTCTTT
8.LTCONS-00055024-Reverse	CCCAATCACCATAACCCACC
9.LTCONS-00055024-Forward	CACCAAGTAGAGCCACAATTGT
9.LTCONS-00055024-Reverse	TTTGCTTTTCTTTTCTTCACCCA
MTCONS-00055015-Forward	CGAGTAGATCAGGCTCCAGG
MTCONS-00055015-Reverse	GTGGTTGATGTGGCGATTGT
Dlo-017525.1-Reverse	ATAGTTGGTGGCGGTGGTTA
Dlo-017525.1-Forward	TCCCCAGTAGTGTCTCCTCA
Dlo-028266.1-Reverse	GGTCTCCATCTTGCGCATG
Dlo-028266.1-Forward	AGATTGGCGGAAACTACGGA
LTCONS-00028275(eTM)-Reverse	AGATTGGCGGAAACTACGGA
LTCONS-00028275(eTM)-Forward	CCTGCTTTGCTTTAGGTCTCC
LTCONS-00028275(target)-Reverse	TGTGCAGTTTAGACAGTGGAA
LTCONS-00028275(target)-Forward	CACGAAGCAACCAACATCCA
Dlo-017394.1-Reverse	AACCAAGACCGAGCCCAGAA
Dlo-017394.1-Forward	TCACTCCTCTCCTCTCTCCG
LTCONS-00032074(eTM)-Reverse	CTATCTGTCACCCCACCACC
LTCONS-00032074(eTM)-Forward	ATGCCAGAGACCACACAAAC
LTCONS-00032074(target)-Reverse	GCTAATGGGGCTAATTGTTTCAG
LTCONS-00032074(target)-Forward	ACCCACTGTTTCTTCTATAGGTG
LTCONS-00039356(target)-Reverse	TCACCATGCTGAGAACGATG
LTCONS-00039356(eTM)-Reverse	CCCCATCTGCCGAATTTGTT
LTCONS-00039356(target)-Forward	CCGCCCACATATGTAAAGCC
LTCONS-00039356(eTM)-Forward	ATGGAGTCACGACCTAGCTG
LTCONS-00042843(eTM)-Reverse	GGGTGGTTCTTCTCTGCTCT
LTCONS-00042843(eTM)-Forward	AGCCGGATCTCTAGTCAACG
Dlo-018542.1-Reverse	ACAGAACAAAAGCAGGAGACC
Dlo-018542.1-Forward	ACCCAGAAAATGCAGCAATAAAA
miR529d	GGGAGAAGAGAGTGAGCACAC
miR403	GGTTAGATTCACGCACAAACT
miR160a*	GCGTTTGAGGAGCCATGCATA
miR157d	TGACAGAAGATAGAGAGCAC
miR406	TAGCTGCTGTTGATAATCCAG
LTCONS-00046326(eTM)-Forward	GCAGGGCTATTACAACCGTT
LTCONS-00046326(target)-Reverse	CCTCCATTCAGCCCCACTAA
LTCONS-00046326(target)-Forward	CCGGGTAAGGAAAACAAGGT
LTCONS-00008100(eTM)-Reverse	ACAGGAGAAGATCAACAAGAGC
LTCONS-00008100(eTM)-Forward	TTTTGGGCGGTGAAGAAGAA
LTCONS-00008100(target)-Reverse	GCTGTGTTGTGTGAGTTCCC
LTCONS-00008100(target)-Forward	CCTCTTGGCCTATCCCTTCT
